# Supplementary material
Source: publisher figshare collection journal article supplement (https://acs.figshare.com/ndownloader/files/21739200)
Supplement: Supplementary file 1 [file 21739200]

## Supporting Information

### **Methanol-to-Olefins Conversion over Small-Pore DDR Zeolites: Tuning the Propylene Selectivity *via* the Olefins-Based Catalytic Cycle**

Jia Hua,<sup>1</sup> Xinglong Dong,<sup>2</sup> Jianjian Wang,<sup>3</sup> Cailing Chen,<sup>2</sup> Zhan Shi,<sup>1</sup> Zhaohui Liu,<sup>2,\*</sup> Yu Han<sup>2,\*</sup>

<sup>1</sup> State Key Laboratory of Inorganic Synthesis & Preparative Chemistry, Jilin University, 2699 Qianjin Street, Changchun 130012, P. R. China

<sup>2</sup> King Abdullah University of Science and Technology (KAUST), Physical Sciences and Engineering Division, Advanced Membranes and Porous Materials Center, Thuwal 23955-6900, Saudi Arabia

<sup>3</sup> Multi-scale Porous Materials Center, Institute of Advanced Interdisciplinary Studies, Chongqing University, Chongqing 400044, P. R. China

Correspondence to: [zhaohui.liu@kaust.edu.sa](mailto:zhaohui.liu@kaust.edu.sa); [yu.han@kaust.edu.sa](mailto:yu.han@kaust.edu.sa)

**Table S1.** Textural properties of DDR zeolites with different Si/Al ratios.

| Catalyst | Si/Al<br>ratio <sup>a</sup> | S <sub>BET</sub> <sup>b</sup><br>m <sup>2</sup> /g | Total<br>Volume <sup>c</sup><br>cm <sup>3</sup> /g | V <sub>Micpore</sub> <sup>d</sup><br>cm <sup>3</sup> /g | V <sub>Ext</sub> <sup>e</sup><br>cm <sup>3</sup> /g | S <sub>Micpore</sub> <sup>f</sup><br>m <sup>2</sup> /g |
|----------|-----------------------------|----------------------------------------------------|----------------------------------------------------|---------------------------------------------------------|-----------------------------------------------------|--------------------------------------------------------|
| DDR_22   | 22                          | 276                                                | 0.147                                              | 0.088                                                   | 0.059                                               | 230                                                    |
| DDR_43   | 43                          | 296                                                | 0.173                                              | 0.097                                                   | 0.076                                               | 234                                                    |
| DDR_87   | 87                          | 263                                                | 0.140                                              | 0.085                                                   | 0.055                                               | 228                                                    |
| DDR_172  | 172                         | 248                                                | 0.148                                              | 0.078                                                   | 0.070                                               | 189                                                    |
| DDR_172* | 168                         | 213                                                | 0.138                                              | 0.053                                                   | 0.085                                               | 143                                                    |

<sup>a</sup> Si/Al ratio was tested by ICP-OES<sup>b</sup> BET surface area<sup>c</sup> Total pore volume determined at the absorption pressure P/P<sub>0</sub> = 0.95.<sup>d</sup> The volume of micropores (< 1.5 nm) calculated by the NLDFT method.<sup>e</sup> The external pore volume calculated from the total volume and the volume of micropores.<sup>f</sup> Surface area of micropores calculated by the NLDFT method.**Table S2.** Reaction conditions used for DDR zeolites.<sup>#</sup>

| DDR samples                                                              | DDR_22 | DDR_43 | DDR_87 | DDR_172 | DDR_172* |
|--------------------------------------------------------------------------|--------|--------|--------|---------|----------|
| MeOH flow rate (mL/min)                                                  | 0.0016 | 0.002  | 0.0011 | 0.001   | 0.0012   |
| Carry gas (He) flow rate (mL/min)                                        | 20     | 20     | 20     | 20      | 20       |
| Catalyst weight (mg)                                                     | 11     | 15     | 20     | 30      | 50       |
| SiC weight (mg)*                                                         | 110    | 100    | 105    | 95      | 80       |
| WHSV (g <sub>MeOH</sub> g <sub>Cat</sub> <sup>-1</sup> h <sup>-1</sup> ) | 6.9    | 6.3    | 2.6    | 1.6     | 1.1      |
| MeOH conversion (%)                                                      | 51.2   | 51.6   | 46.4   | 47.1    | 52.9     |

<sup>#</sup> The reactions are performed at 400 °C and 10 mins on stream

\* SiC is added to dilute the catalyst and its amount is adjusted to keep the length of catalyst bed identical

**Table S3.** Reaction conditions used for HZSM-5 zeolites.<sup>#</sup>

| Si/Al in the HZSM-5 samples                    | 55   | 115  | 651  | 1119 | 1580 |
|------------------------------------------------|------|------|------|------|------|
| DME pressure /kPa                              | 55   | 57   | 54   | 51   | 49   |
| Total feed pressure /kPa                       | 104  | 105  | 106  | 103  | 104  |
| Space-velocity /mol C (mol Al-s) <sup>-1</sup> | 0.36 | 2.40 | 3.98 | 3.23 | 2.80 |
| Net carbon converted /%                        | 47   | 48   | 48   | 46   | 52   |

<sup>#</sup> Crystallite size of HZSM-5: 150–240 nm; reaction temperature: 350 °C. See more details in reference 31.

**Table S4.** Conversion-weighted average selectivity over the entire deactivation cycle.

| DDR samples                                                                                                                                                   | DDR_22                              | DDR_172                            | DDR_172*                            |
|---------------------------------------------------------------------------------------------------------------------------------------------------------------|-------------------------------------|------------------------------------|-------------------------------------|
| Amount of converted MeOH (mmol)                                                                                                                               | 19.38                               | 10.33                              | 17.38                               |
| Yield of C <sub>2</sub> <sup>-</sup> / C <sub>3</sub> <sup>-</sup> / C <sub>4</sub> <sup>-</sup> / C <sub>5+</sub> / C <sub>1-4</sub> <sup>-</sup> (mmol C)   | 6.88 / 7.23 / 1.79 / 0.74 / 2.75    | 2.75 / 5.17 / 1.02 / 0.48 / 0.90   | 4.04 / 9.32 / 1.89 / 0.77 / 1.36    |
| Selectivity of C <sub>2</sub> <sup>-</sup> / C <sub>3</sub> <sup>-</sup> / C <sub>4</sub> <sup>-</sup> / C <sub>5+</sub> / C <sub>1-4</sub> <sup>-</sup> (C%) | 35.48 / 37.28 / 9.23 / 3.84 / 14.17 | 26.64 / 50.07 / 9.91 / 4.64 / 8.74 | 23.27 / 53.64 / 10.85 / 4.43 / 7.81 |

**Table S5.** Quantification of residual species (overall aliphatics and MBs) analyzed in Figure 5 by integrating their peak areas in the GC profiles.

| DDR samples | Area of Aliphatics | Area of MBs | MBs/Aliphatics |
|-------------|--------------------|-------------|----------------|
| DDR_22      | 268775             | 480579      | 1.788          |
| DDR_172     | 345415             | 406185      | 1.176          |
| DDR_172*    | 278593             | 113327      | 0.407          |

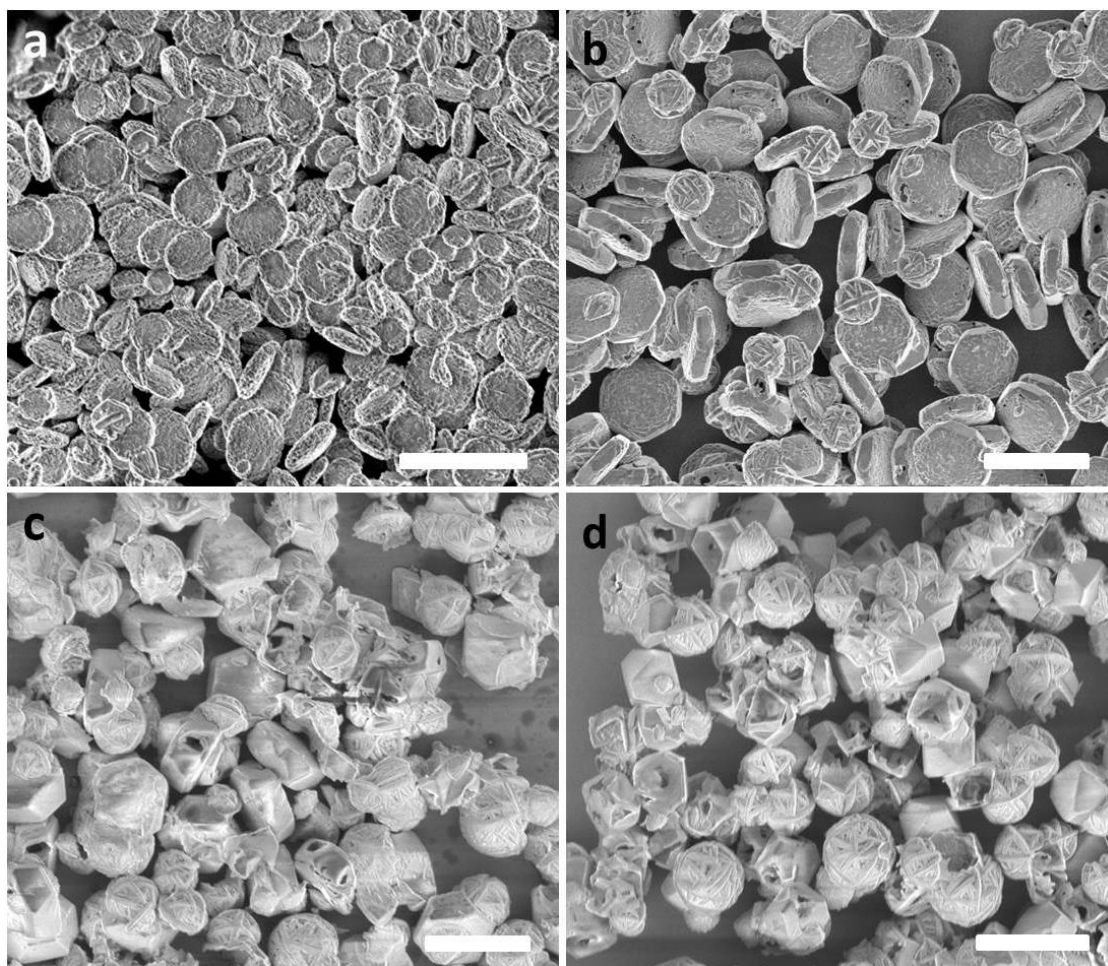

**Figure S1.** SEM images of as-synthesized DDR zeolites with different Si/Al ratios: (a) Si/Al = 22; (b) Si/Al = 43; (c) Si/Al = 87; (d) Si/Al = 172. The scale bars represent 10  $\mu\text{m}$ .

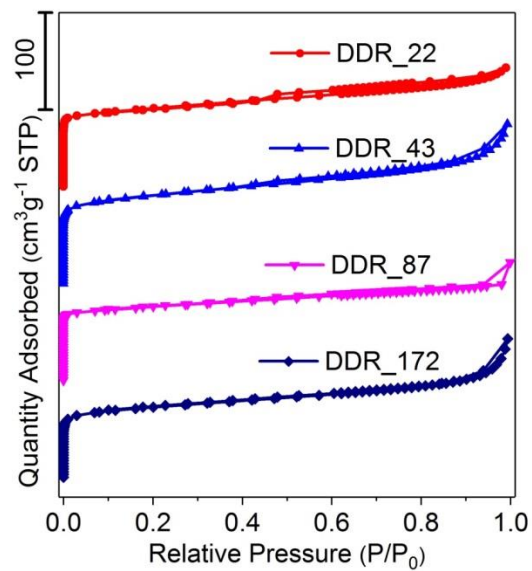

**Figure S2.** Ar adsorption isotherms of DDR zeolites with different Si/Al ratios.

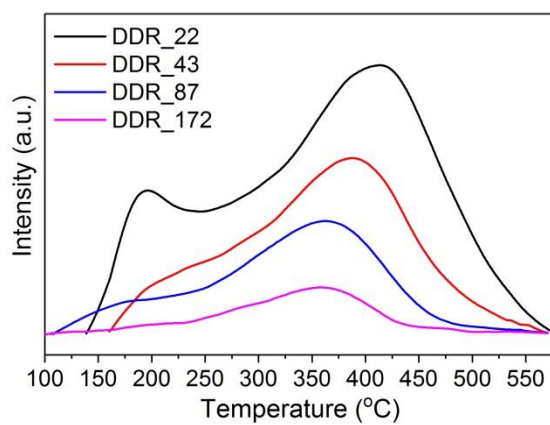

**Figure S3.** NH<sub>3</sub>-TPD profiles of the as-synthesized DDR zeolites with different Si/Al ratios.

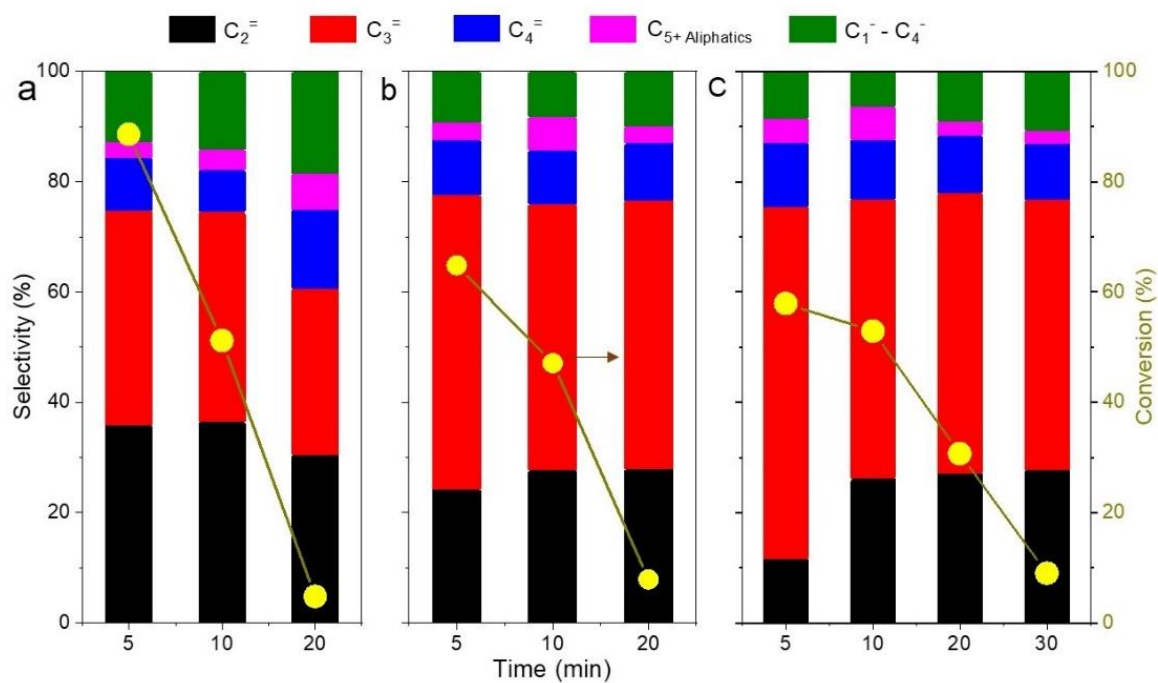

**Figure S4.** Conversion of methanol and effluent hydrocarbon product selectivity versus time-on-stream during the reaction of MTO over DDR\_22 (a), DDR\_172 (b) and DDR\_172\* (c).

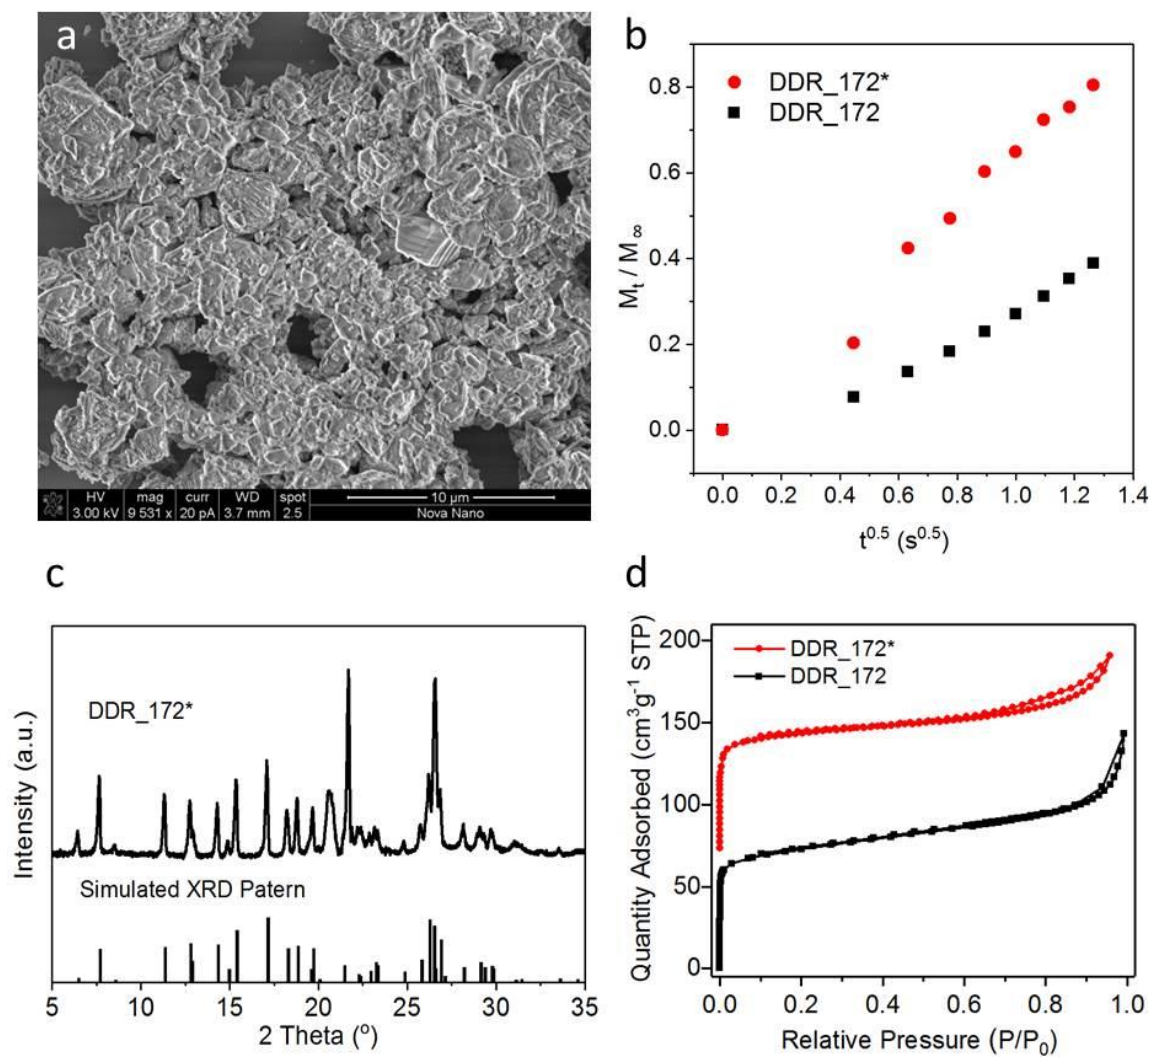

**Figure S5.** (a) SEM image of DDR\_172\*. (b) Adsorption uptake of propylene on DDR\_172\* in comparison with that of DDR\_172. (c) PXRD pattern of DDR\_172\*. (d) Ar adsorption isotherms of DDR\_172\* in comparison with that of DDR\_172.

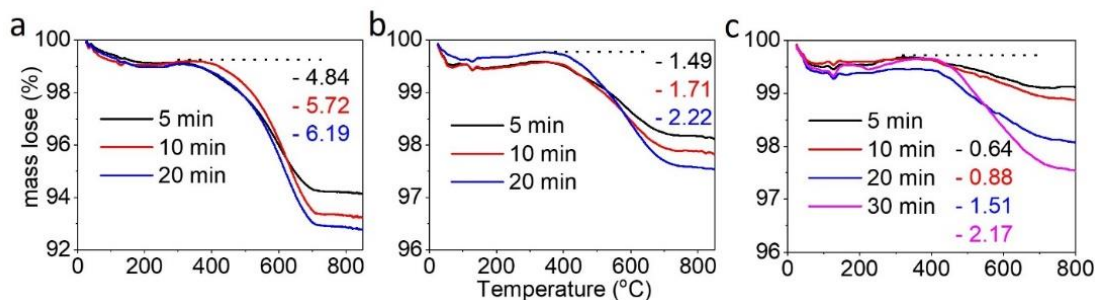

**Figure S6.** Thermogravimetric analysis of used catalysts (a, DDR\_22; b, DDR\_172; c, DDR\_172\*) at different reaction times.

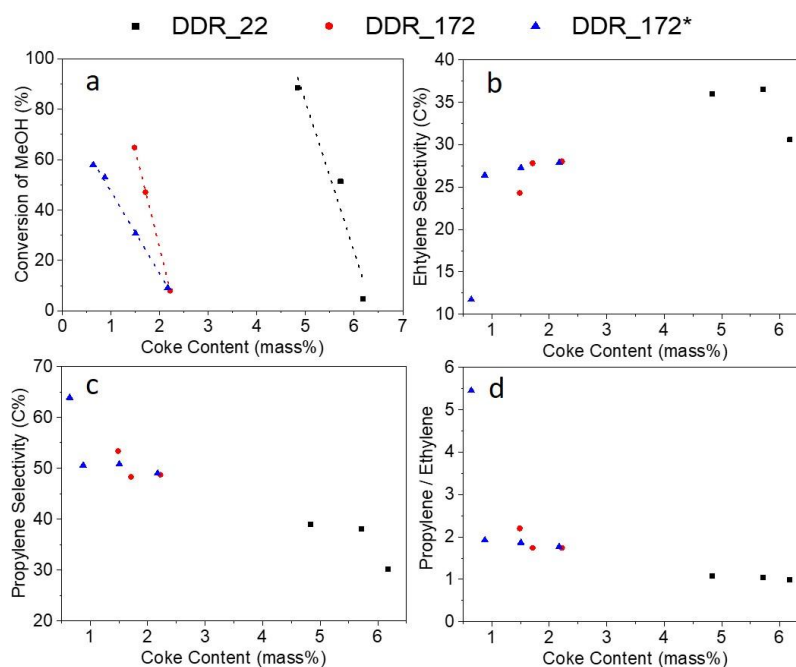

**Figure S7.** Plots of conversion of methanol (a), Ethylene selectivity (b), Propylene selectivity (c), and Propylene/Ethylene ratio (d), as a function of the coke content in used DDR zeolites.

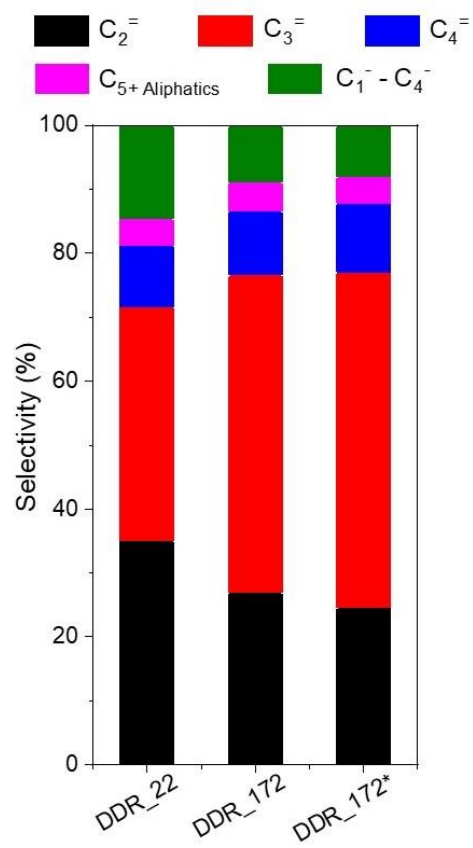

**Figure S8.** Conversion-weighted averaged selectivity over the entire reaction on DDR\_22, DDR\_172, and DDR\_172\*, as labelled.

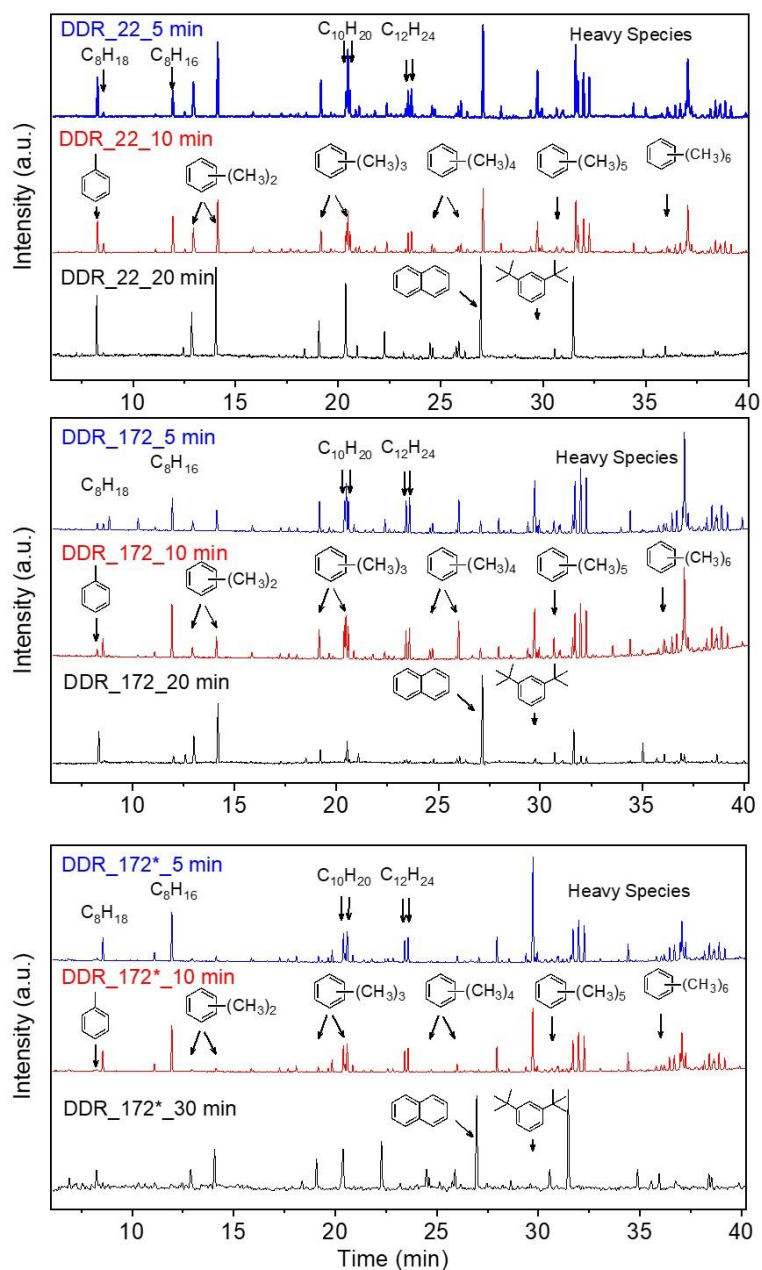

**Figure S9.** GC analysis of the residual hydrocarbon species extracted from used DDR catalysts (DDR\_22, DDR\_172 and DDR\_172\* from top to down) at different reaction times.

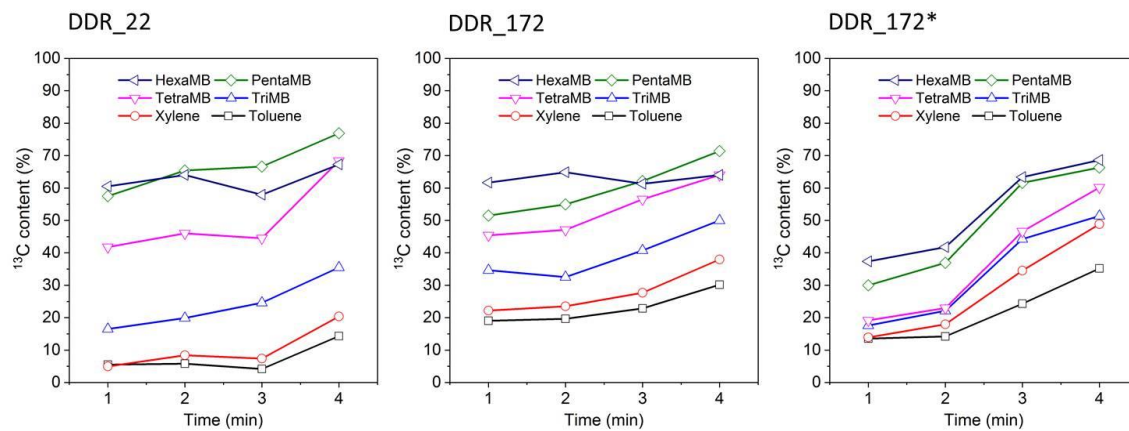

**Figure S10.** Evolution of  $^{13}\text{C}$  content in the residual species in the used catalysts after  $^{12}\text{C}/^{13}\text{C}$ -methanol feed switch over different DDR zeolites.
